# Supplementary material
Source: publisher site journal article supplement (https://www.dovepress.com/article/224502)
Supplement: Supplementary file 1 [file get_supplementary_file.php]

**Table S1** Characterization of synthesized polymer

|                                          | DP of PPS |                    | DP of PEG |                    | $\overline{M}_n$ |                   | d)   |
|------------------------------------------|-----------|--------------------|-----------|--------------------|------------------|-------------------|------|
|                                          | Theo.     | Cal. <sup>a)</sup> | Theo.     | Cal. <sup>b)</sup> | NMR              | GPC <sup>c)</sup> |      |
| <b>PPS<sub>20</sub>-PEG<sub>12</sub></b> | 20        | 24.5               | 12        | 12.8               | 2400             | 4300              | 1.14 |

**Notes:**

a Calculated from the ratio of the <sup>1</sup>H NMR signal of the CH<sub>2</sub> groups in PPS repeating units and signals of the CH<sub>3</sub> group in PEG units.

b Calculated from the ratio of the <sup>1</sup>H NMR signal of the CH<sub>2</sub> groups in PEG repeating units and signals of the CH<sub>3</sub> group in PEG units.

c Determined via GPC in DMF at 30 °C with poly (methyl methacrylate) standards.

d Dispersity index calculated as  $M_w/M_n$ , and determined at the concentration of 1 mg/mL.

**Abbreviations:** DP, Degree of polymerization;  $\overline{M}_n$ , Number-average Molecular Weight; Theo, Theoretically; Cal, Calculation; NMR, Nuclear Magnetic Resonance spectroscopy; GPC, Gel permeation chromatography.

**Table S2** Drug loading and encapsulation efficiency of DOX, ZnPc and DiD loaded polymersomes

|       | DL of DOX | EE of DOX | DL of ZnPc | EE of ZnPc | DL of DiD | EE of DiD |
|-------|-----------|-----------|------------|------------|-----------|-----------|
| PD    | 11.69%    | 44.12%    | -          | -          | -         | -         |
| PZ    | -         | -         | 2.21%      | 54.69%     | -         | -         |
| PZD   | 5.44%     | 41.01%    | 2.45%      | 69.92%     | -         | -         |
| P-DiD | -         | -         | 1.36%      | 38.19%     | 3.33%     | 61.10%    |

**Abbreviations:** DL, drug loading efficiency; EE, encapsulation efficiency; DOX, doxorubicin hydrochloride; ZnPc, zinc phthalocyanine; PZD, ZnPc and DOX coloaded polymersomes; PZ, ZnPc loaded polymersomes; PD, DOX loaded polymersomes

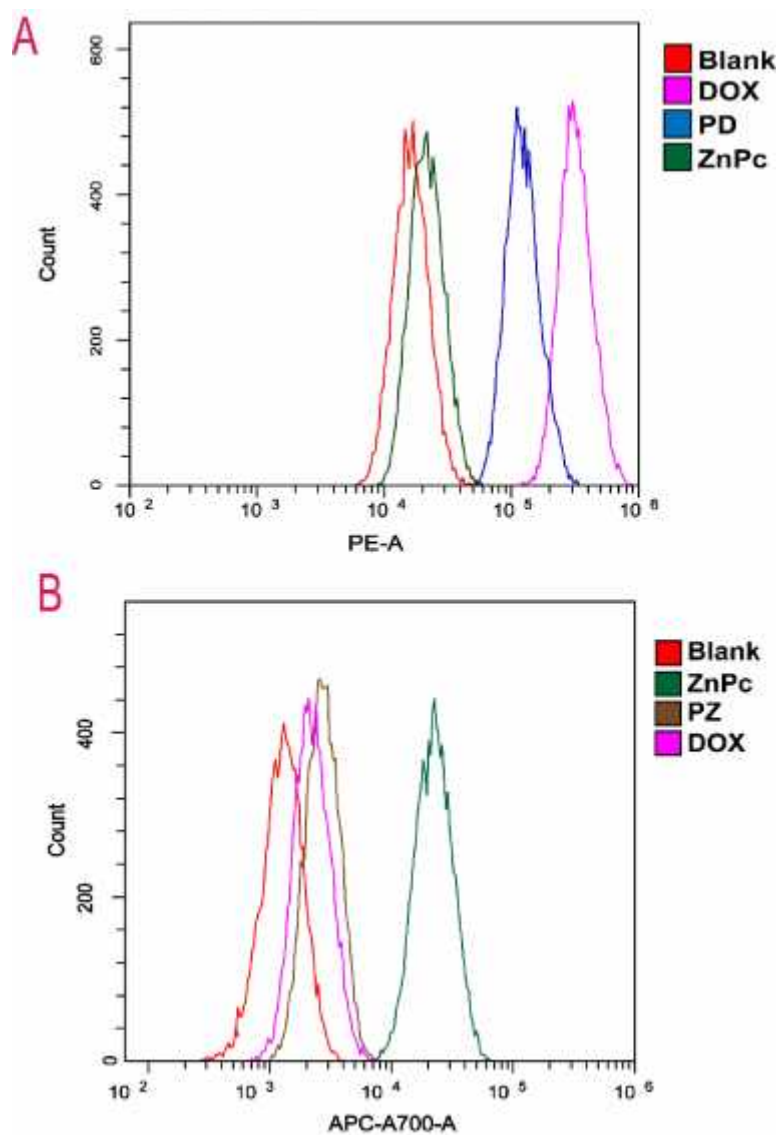

**Figure S1** Fluorescence intensity of different samples in different channels. A) Fluorescence intensity of DOX, PD and ZnPc in the PE-A channel. B) Fluorescence intensity of ZnPc, PZ and DOX in the APC-A700-A channel.

**Abbreviations:** DOX, doxorubicin hydrochloride; ZnPc, zinc phthalocyanine; PZD, ZnPc and DOX coloaded polymersomes; PZ, ZnPc loaded polymersomes; PD, DOX loaded polymersomes

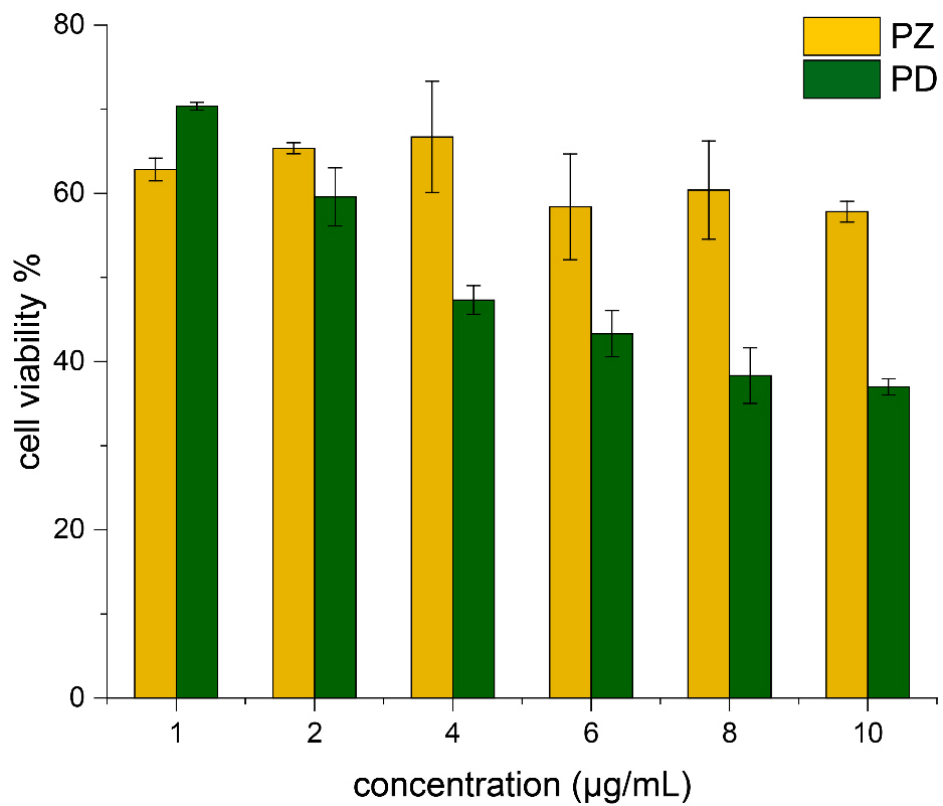

**Figure S2** Cytotoxicity of PZ and PD against A375 cells without NIR irradiation.

**Abbreviations:** PZ, ZnPc loaded polymersomes; PD, DOX loaded polymersomes

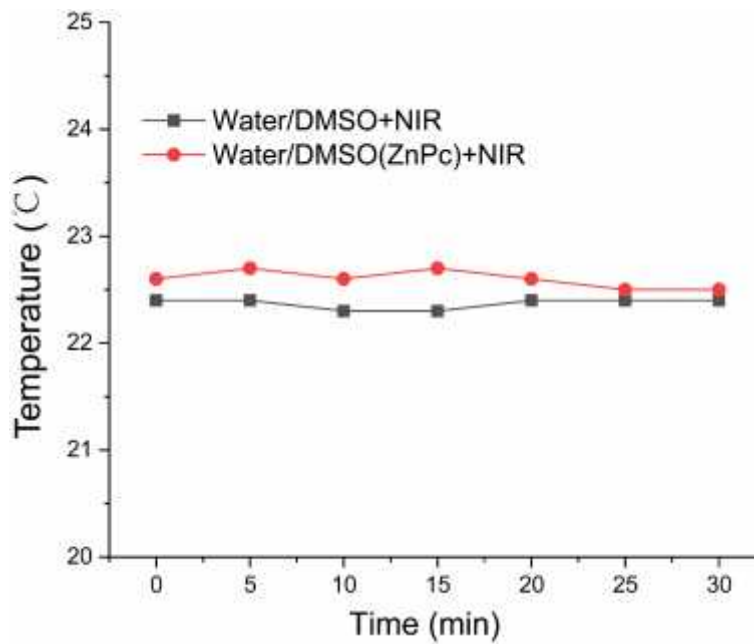

**Figure S3** Temperature changes of water/DMSO mixed solution under the irradiation of 660 nm laser at 100mW/cm<sup>2</sup> with or without ZnPc for 30 minutes.

**Abbreviations:** ZnPc, zinc phthalocyanine; NIR, near infrared light
